# Supplementary material for: Solution processable amorphous hafnium silicate dielectrics and their application in oxide thin film transistors
Source: Royal Society of Chemistry journal article supplement (doi:10.1039/c5tc02485d), 2015-01-01
Supplement: c5tc02485d1.pdf [file c5tc02485d1.pdf]

### Supplementary figures:

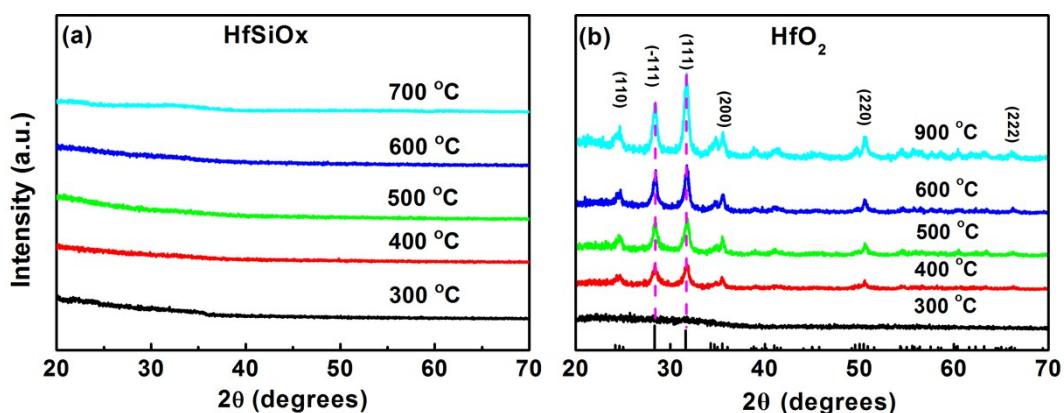

Figure S1 (a) XRD patterns of HfSiOx films annealed at different temperatures. (b) XRD patterns of HfO<sub>2</sub> films annealed at different temperatures.

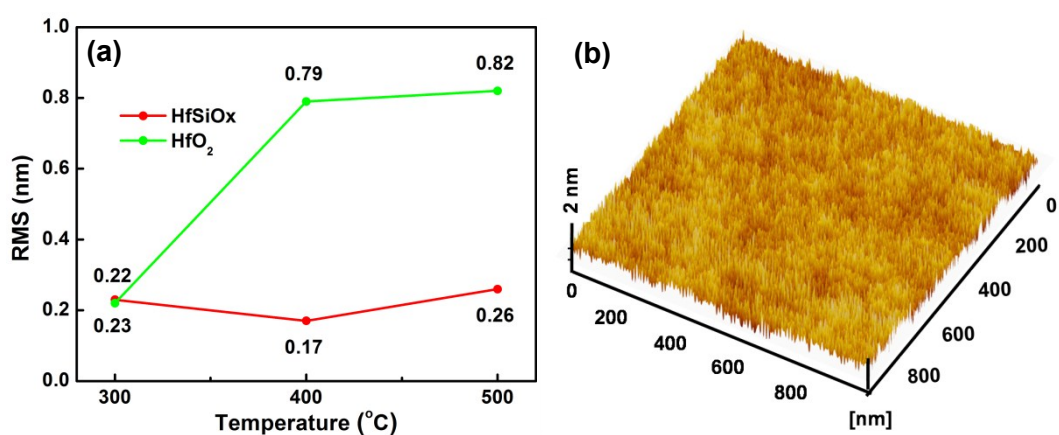

Figure S2 (a) Surface root mean square (RMS) roughness of HfO<sub>2</sub> and HfSiOx films annealed at different temperatures. (b) Typical AFM image of HfSiOx films annealed at 500 °C.

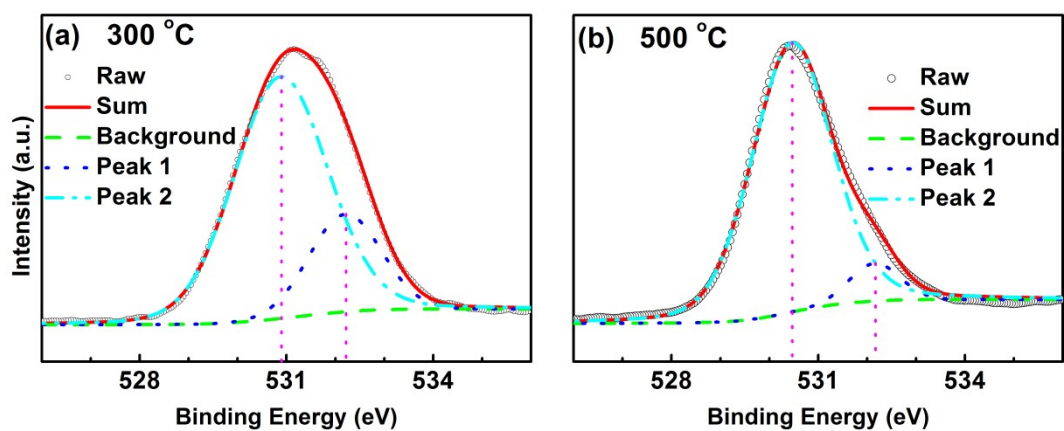

Figure S3 O 1s XPS spectra of HfSiOx films annealed at 300 °C and 500 °C, respectively.

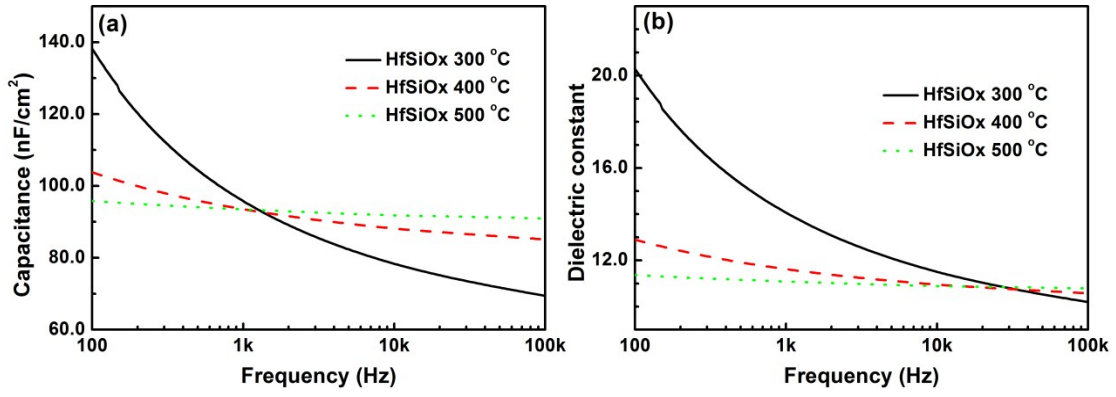

Figure S4 Capacitance-frequency and dielectric constant-frequency plots of HfSiOx films annealed at different temperatures.

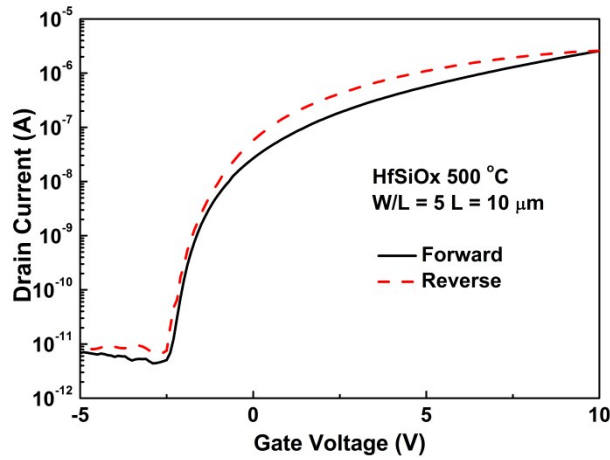

Figure S5 The hysteresis data of TFTs including HfSiOx layers annealed at 500 °C

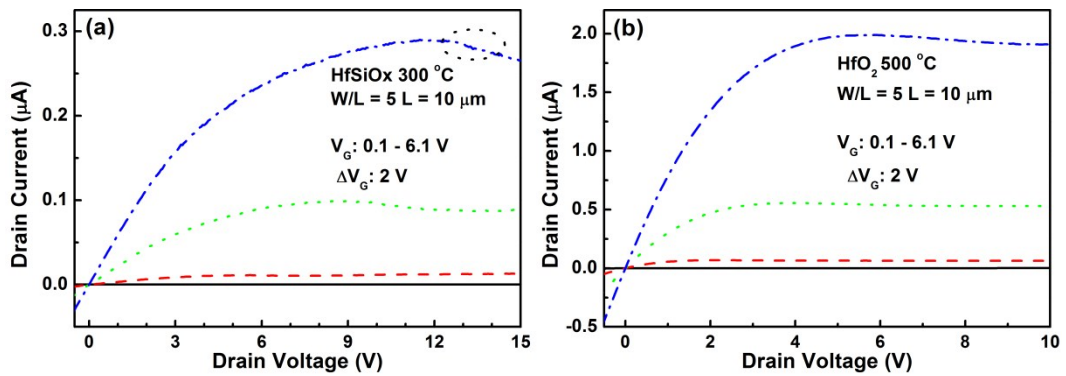

Figure S6 Output characteristics of HIZO TFTs with HfSiOx dielectrics annealed at 300 °C and HIZO TFTs with HfO<sub>2</sub> dielectrics annealed at 500 °C.

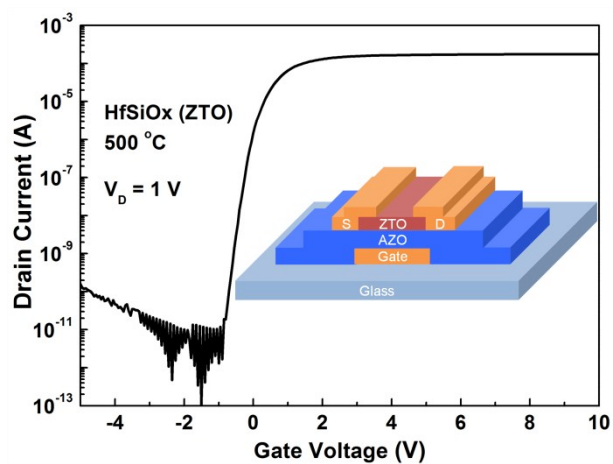

Figure S7 Transfer characteristics of ZTO TFTs with HfSiOx dielectrics annealed at 500 °C. Inset was the structure schematic of the ZTO TFTs.
